# Supplementary material
Source: PubMed Central journal article supplement (PMC4408416)
Supplement: supp_msv031_SuppMaterial_20141221.pdf [file supp_msv031_SuppMaterial_20141221.pdf]

**Supplementary Table 1.** Top significant categories identified by Ingenuity Pathway Analysis for pHAR-associated schizophrenia genes.

|                                                          | P-value             |
|----------------------------------------------------------|---------------------|
| <b>Top Canonical Pathways</b>                            |                     |
| Protein Kinase A Signaling                               | 5.41E-05            |
| Ephrin Receptor Signaling                                | 4.64E-04            |
| B Cell Receptor Signaling                                | 2.74E-03            |
| Sertoli Cell-Sertoli Cell Junction Signaling             | 2.98E-03            |
| Epithelial Adherens Junction Signaling                   | 6.02E-03            |
| <b>Top Molecular and Cellular Functions</b>              |                     |
| Cellular Development                                     | 6.94E-06 - 2.55E-02 |
| Cell Morphology                                          | 2.96E-05 - 3.11E-02 |
| Cellular Assembly and Organization                       | 2.96E-05 - 3.11E-02 |
| Cellular Function and Maintenance                        | 2.96E-05 - 2.46E-02 |
| Cell-To-Cell Signaling and Interaction                   | 1.64E-04 - 3.11E-02 |
| <b>Top Physiological System Development and Function</b> |                     |
| Nervous System Development and Function                  | 6.94E-06 - 3.11E-02 |
| Tissue Development                                       | 6.94E-06 - 3.11E-02 |
| Embryonic Development                                    | 2.40E-04 - 2.78E-02 |
| Organ Morphology                                         | 3.28E-04 - 3.11E-02 |
| Organismal Development                                   | 3.28E-04 - 3.11E-02 |

**Supplementary Table 2.** P-values and corrected P-values (in parenthesis) from the INRICH analysis of schizophrenia GWAS regions in genes showing human-specific expression shifts in different organs.

|                   | Cerebellum and Brain             | Kidney           | Liver            | Testis           |
|-------------------|----------------------------------|------------------|------------------|------------------|
| Nominal<br>P<1e-2 | <b>0.010</b><br>( <b>0.034</b> ) | 0.193<br>(0.518) | 0.765<br>(0.994) | 0.495<br>(0.886) |
| Nominal<br>P<1e-3 | <b>0.034</b><br>(0.116)          | 0.254<br>(0.607) | 0.691<br>(0.979) | 0.661<br>(0.966) |
| Nominal<br>P<1e-4 | 0.112<br>(0.326)                 | 0.789<br>(0.993) | 0.759<br>(0.989) | 0.214<br>(0.583) |
| Nominal<br>P<1e-5 | <b>0.028</b><br>(0.083)          | 0.550<br>(0.926) | 0.739<br>(0.985) | 0.341<br>(0.688) |
| Nominal<br>P<1e-6 | <b>0.026</b><br>(0.075)          | 0.819<br>(0.994) | 1.000<br>(1.000) | 0.087<br>(0.247) |
| Nominal<br>P<1e-7 | <b>0.032</b><br>(0.092)          | 0.630<br>(0.941) | 1.000<br>(1.000) | 0.177<br>(0.464) |

**Supplementary Table 3.** P-values and corrected P-values (in parenthesis) from the INRICH analysis of schizophrenia GWAS regions in genes showing human-specific expression shifts in cerebellum and brain using brain-expressed genes as background.

|                   | Cerebellum and Brain                     |                                                 |
|-------------------|------------------------------------------|-------------------------------------------------|
|                   | Background: genes expressed in the brain | Background: genes highly expressed in the brain |
| Nominal<br>P<1e-2 | <b>0.036</b><br>( <b>0.035</b> )         | <b>0.038</b><br>( <b>0.043</b> )                |
| Nominal<br>P<1e-3 | 0.195<br>(0.197)                         | 0.170<br>(0.172)                                |
| Nominal<br>P<1e-4 | 0.335<br>(0.325)                         | 0.485<br>(0.492)                                |
| Nominal<br>P<1e-5 | 0.167<br>(0.154)                         | 0.375<br>(0.368)                                |
| Nominal<br>P<1e-6 | 0.080<br>(0.081)                         | 0.250<br>(0.252)                                |
| Nominal<br>P<1e-7 | <b>0.042</b><br>( <b>0.041</b> )         | 0.148<br>(0.135)                                |

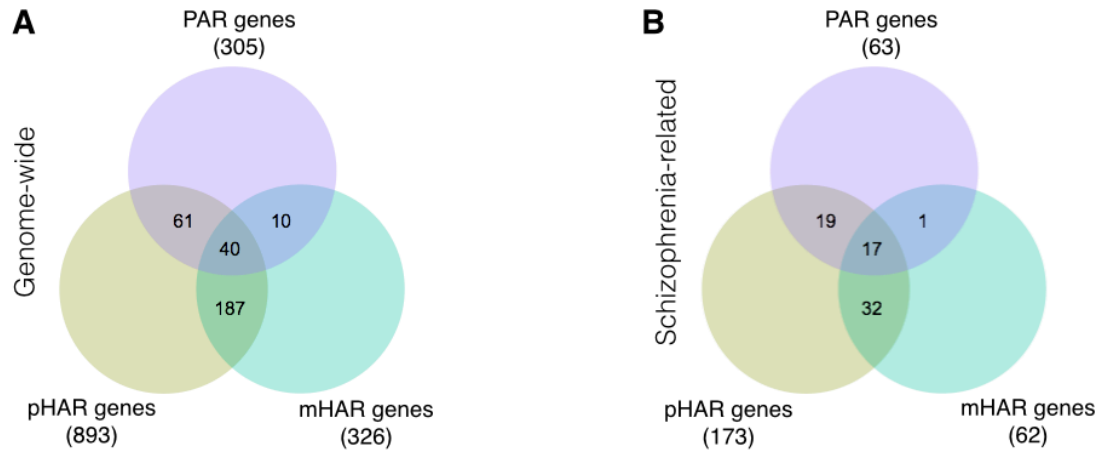

**Supplementary Figure 1.** A) Number of genes at 100kb flanking regions of pHARs, PARs, and mHARs. B) Number of schizophrenia-related (nominal  $P < 1e-4$ ) genes at 100kb flanking regions of pHARs, PARs, and mHARs.

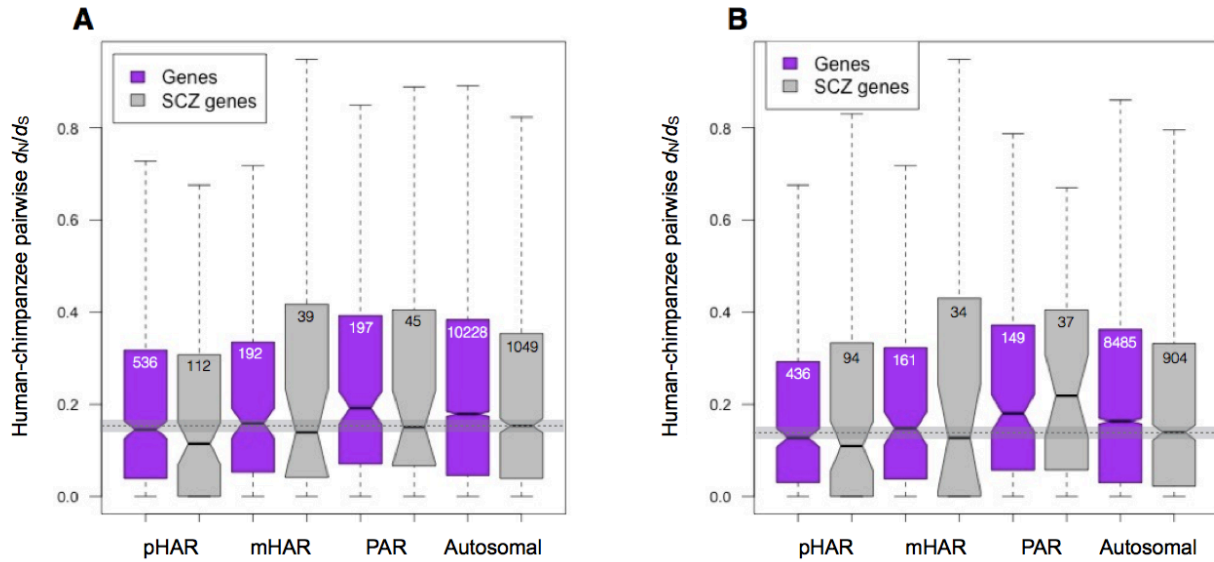

**Supplementary Figure 2.** Human-chimpanzee pairwise  $d_N/d_S$  comparisons across different sets of genes for A) genes expressed in the brain and B) genes highly expressed in the brain. The purple boxes represent autosomal genes and the ones that are at 100kb flanking regions of pHARs, mHARs, and PARs. The grey boxes represent the intersection of each corresponding gene set with schizophrenia genes under nominal  $P < 1e-4$ . Number of genes after filtering is given in the box for each category. Outliers are omitted from the plots. For both plots, the horizontal shade represents median  $d_N/d_S$  and its confidence interval of all the schizophrenia genes (the last box).

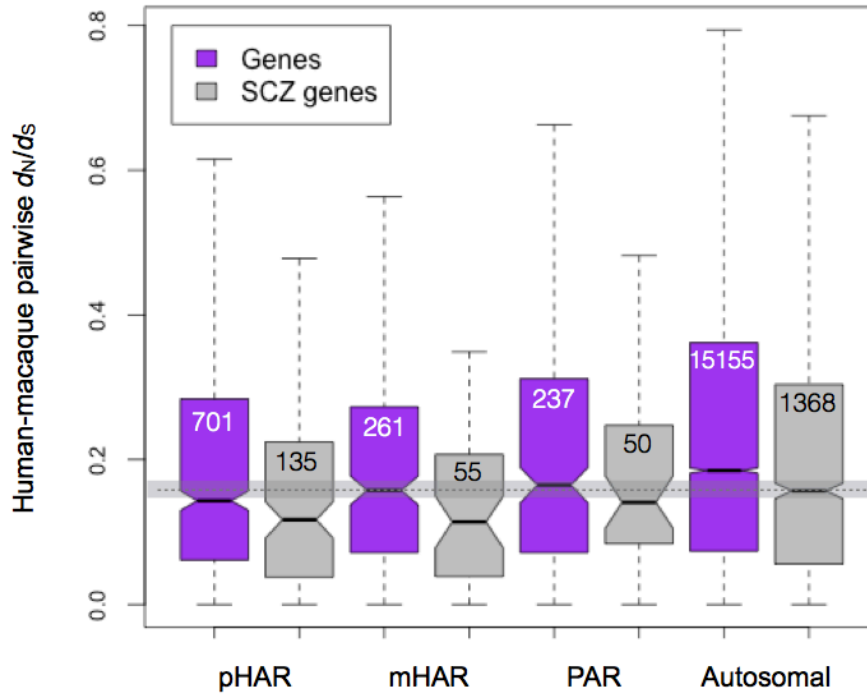

**Supplementary Figure 3.** Human-macaque pairwise  $d_N/d_S$  comparison across different sets of genes. The purple boxes represent autosomal genes and the ones that are at 100kb flanking regions of pHARs, mHARs, and PARs. The grey boxes represent the intersection of each corresponding gene set with the schizophrenia genes under nominal  $P < 1e-4$ . Number of genes after filtering is given in the box for each category. Outliers are omitted from the plot. The horizontal shade represents median  $d_N/d_S$  and its confidence interval of all the schizophrenia genes (the last box).
